# Supplementary material for: Enrichment of Verrucomicrobia, Actinobacteria and Burkholderiales drives selection of bacterial community from soil by maize roots in a traditional milpa agroecosystem
Source: PubMed Central journal article supplement (PMC6301694; doi:10.1371/journal.pone.0208852), 2018-12-20
Supplement: pone.0208852.s001.pdf [file pone.0208852.s001.pdf]

S1 Table. Primers used for sequencing library preparation

| Forward primers |               |                                           |               |                    |                       |                       |
|-----------------|---------------|-------------------------------------------|---------------|--------------------|-----------------------|-----------------------|
| Sample          |               | 5' Illumina adapter                       |               | Forward primer pad | Forward primer linker | Forward primer Fwd515 |
| All samples     |               | AATGATACGGCGACCACCGAGATCTACAC             |               | TATGGTAATT         | GT                    | GTGCCAGCMGCCGCGGTAA   |
| Reverse primers |               |                                           |               |                    |                       |                       |
| Sample          | Primer number | Reverse complement of 3' Illumina adapter | GoLay Barcode | Reverse primer pad | Reverse primer linker | Reverse primer Rev806 |
| Boxo1/85        | 806rcbc85     | CAAGCAGAAGACGGCATAACGAGAT                 | CAGCTAGAACGC  | AGTCAGTCAG         | CC                    | GGACTACHVGGGTWCTAAT   |
| Boxo1C.13       | 806rcbc13     | CAAGCAGAAGACGGCATAACGAGAT                 | CCTCGTTCGACT  | AGTCAGTCAG         | CC                    | GGACTACHVGGGTWCTAAT   |
| Boxo2.73        | 806rcbc73     | CAAGCAGAAGACGGCATAACGAGAT                 | GACGGAACCCAT  | AGTCAGTCAG         | CC                    | GGACTACHVGGGTWCTAAT   |
| Boxo2C.1        | 806rcbc1      | CAAGCAGAAGACGGCATAACGAGAT                 | AATCAGTCTCGT  | AGTCAGTCAG         | CC                    | GGACTACHVGGGTWCTAAT   |
| Boxo3.61        | 806rcbc61     | CAAGCAGAAGACGGCATAACGAGAT                 | ATGAGACTCCAC  | AGTCAGTCAG         | CC                    | GGACTACHVGGGTWCTAAT   |
| Boxo3C.86       | 806rcbc86     | CAAGCAGAAGACGGCATAACGAGAT                 | TCCCAGAACAAC  | AGTCAGTCAG         | CC                    | GGACTACHVGGGTWCTAAT   |
| Boxo4.49        | 806rcbc49     | CAAGCAGAAGACGGCATAACGAGAT                 | TAGGAAGTGGCC  | AGTCAGTCAG         | CC                    | GGACTACHVGGGTWCTAAT   |
| Boxo5.37        | 806rcbc37     | CAAGCAGAAGACGGCATAACGAGAT                 | TCGAGACTGCA   | AGTCAGTCAG         | CC                    | GGACTACHVGGGTWCTAAT   |
| Boxo5C.74       | 806rcbc74     | CAAGCAGAAGACGGCATAACGAGAT                 | CAAGCATGCCTA  | AGTCAGTCAG         | CC                    | GGACTACHVGGGTWCTAAT   |
| Boxo6.25        | 806rcbc25     | CAAGCAGAAGACGGCATAACGAGAT                 | TAGGATTGCTCG  | AGTCAGTCAG         | CC                    | GGACTACHVGGGTWCTAAT   |
| Boxo6C.62       | 806rcbc62     | CAAGCAGAAGACGGCATAACGAGAT                 | GAATCTTCGAGC  | AGTCAGTCAG         | CC                    | GGACTACHVGGGTWCTAAT   |
