# Supplementary material for: Enrichment of Verrucomicrobia, Actinobacteria and Burkholderiales drives selection of bacterial community from soil by maize roots in a traditional milpa agroecosystem
Source: PubMed Central journal article supplement (PMC6301694; doi:10.1371/journal.pone.0208852), 2018-12-20
Supplement: pone.0208852.s003.pdf [file pone.0208852.s003.pdf]

S3 Table. Length distribution of the clean, pre-processed, quimera-free DNA Sequence Variants

| Length (nt) | # of Secuence Variants |
|-------------|------------------------|
| 238         | 4                      |
| 245         | 2                      |
| 246         | 1                      |
| 247         | 9                      |
| 248         | 215                    |
| 249         | 3593                   |
| 250         | 22                     |
| 251         | 2                      |
| 282         | 1                      |
| Total       | 3849                   |
