# Supplementary material for: Enrichment of Verrucomicrobia, Actinobacteria and Burkholderiales drives selection of bacterial community from soil by maize roots in a traditional milpa agroecosystem
Source: PubMed Central journal article supplement (PMC6301694; doi:10.1371/journal.pone.0208852), 2018-12-20
Supplement: pone.0208852.s004.pdf [file pone.0208852.s004.pdf]

S4 Table. Soil analysis parameters.

| Parameter      | Value     |
|----------------|-----------|
| Sand           | 29%       |
| Clay           | 39%       |
| Silt           | 32%       |
| pH             | 6.7       |
| Organic matter | 3.61%     |
| N-NO3          | 47.4 ppm  |
| P-PO4          | 196.6 ppm |
| K              | 289 ppm   |
| Ca             | 7680 ppm  |
| Mg             | 570 ppm   |
| S              | 20 ppm    |
| Fe             | 8.8 ppm   |
| Cu             | 2.2 ppm   |
| Zn             | 11 ppm    |
| Mn             | 5.5 ppm   |
| Na             | 92 ppm    |
