# Supplementary material for: Enrichment of Verrucomicrobia, Actinobacteria and Burkholderiales drives selection of bacterial community from soil by maize roots in a traditional milpa agroecosystem
Source: PubMed Central journal article supplement (PMC6301694; doi:10.1371/journal.pone.0208852), 2018-12-20
Supplement: pone.0208852.s005.pdf [file pone.0208852.s005.pdf]

S5 Table. Wilcoxon tests for the differences in abundances of phyla (Only the 14 most abundant phyla were tested).

| Phylum           | Control       | Maize         | P-value      |
|------------------|---------------|---------------|--------------|
| Proteobacteria   | 0.3607±0.0190 | 0.3730±0.0125 | 0.421        |
| Acidobacteria    | 0.2324±0.0101 | 0.2057±0.0591 | 0.222        |
| Actinobacteria   | 0.1366±0.0324 | 0.1392±0.0724 | 0.548        |
| Bacteroidetes    | 0.0474±0.0084 | 0.0601±0.0105 | 0.055        |
| Chloroflexi      | 0.0524±0.0004 | 0.0401±0.0048 | 0.095        |
| Planctomycetes   | 0.0470±0.0025 | 0.0438±0.0146 | 0.151        |
| Verrucomicrobia  | 0.0266±0.0057 | 0.0367±0.0095 | <b>0.008</b> |
| Gemmatimonadetes | 0.0359±0.0042 | 0.0240±0.0128 | <b>0.032</b> |
| Nitrospirae      | 0.0112±0.0033 | 0.0065±0.0040 | 0.095        |
| Cyanobacteria    | 0.0078±0.0099 | 0.0086±0.0082 | 0.548        |
| Thaumarchaeota   | 0.0079±0.0021 | 0.0082±0.0035 | 1.000        |
| Firmicutes       | 0.0047±0.0019 | 0.0030±0.0019 | 0.310        |
| WS3              | 0.0036±0.0041 | 0.0027±0.0005 | 0.548        |
| Armatimonadetes  | 0.0032±0.0012 | 0.0037±0.0004 | 0.421        |

Note: Values are medians ± inter quartile ranges. Highlighted p-values are considered significant at the 95% confidence level.
