# Supplementary material for: Enrichment of Verrucomicrobia, Actinobacteria and Burkholderiales drives selection of bacterial community from soil by maize roots in a traditional milpa agroecosystem
Source: PubMed Central journal article supplement (PMC6301694; doi:10.1371/journal.pone.0208852), 2018-12-20
Supplement: pone.0208852.s006.pdf [file pone.0208852.s006.pdf]

S6 Table. Wilcoxon tests for differences of Sequence Variants (SV) between Maize-root samples and Controls.

| SV                               | Taxonomy*                 | Maize | Control | pvalue       |
|----------------------------------|---------------------------|-------|---------|--------------|
| b3f31ece386a0592859eb3d102987f9f | Family Nitrosomonadaceae  | 0±0   | 90±16   | 0.0158730159 |
| 32bc11b0aa283e3d17c6636c76ad4b74 | Class Acidobacteria       | 0±0   | 82±16   | 0.0079365079 |
| e0fc752ac14b8fc73b082430ddd5c660 | Class Betaproteobacteria  | 0±0   | 62±14   | 0.0158730159 |
| a544411239b3db5d010ee4c445be0df1 | Class Acidobacteria       | 0±0   | 51±7    | 0.0079365079 |
| e2d0f07a3a468929944b01f9ef0a3a82 | Class Acidobacteria       | 0±0   | 47±17   | 0.0079365079 |
| d0c86903b8fd0352196d1975ae371e41 | Order Rhizobiales         | 0±0   | 46±22   | 0.0079365079 |
| 435407f65258b5c108bb578a11eedfd4 | Family Gemmatimonadaceae  | 0±36  | 45±8    | 0.0079365079 |
| cdc407c13a646e74e35fb1fac4ddf75e | Order Xanthomonadales     | 0±20  | 45±6    | 0.0158730159 |
| f219e981cc92ace9a87ec52bb6aed3c8 | Genus Devosia             | 0±0   | 42±14   | 0.0317460317 |
| da9e3abfe1dfec7f41111d733754c0c6 | Order Rhizobiales         | 0±0   | 39±7    | 0.0079365079 |
| d128e023534f57584bb2b819de9f6a5b | Phylum Planctomycetes     | 0±0   | 38±11   | 0.0317460317 |
| 501d4c06a8a698f0f6e2b9ba720563b5 | Class Acidobacteria       | 0±0   | 37±7    | 0.0079365079 |
| 05a683b4d7a634a24215077043da06eb | Class Acidobacteria       | 0±20  | 36±8    | 0.0158730159 |
| 5aaf22ed43ac6780cda73c6dc35ba24e | Family Nitrosomonadaceae  | 0±0   | 36±13   | 0.0317460317 |
| 8643fc7a49aa927e2f48e7db617671bd | Class Acidobacteria       | 0±0   | 34±6    | 0.0079365079 |
| e9bbd9edb7df0df7197d8de766843a3d | Family Nitrosomonadaceae  | 0±0   | 32±4    | 0.0079365079 |
| 3995a3d33c949a95fffd41e9df3d1e66 | Family Gemmatimonadaceae  | 28±32 | 57±17   | 0.0158730159 |
| bf6fea04809a5226b3d19e6586913864 | Family Sandaracinaceae    | 0±0   | 27±16   | 0.0079365079 |
| 969911a14519cecd682f0db9a4167350 | Family Polyangiaceae      | 0±0   | 26±6    | 0.0079365079 |
| 34a71e8fff0373ae73ecc59ff4e88e2d | Family Planctomycetaceae  | 0±0   | 26±2    | 0.0158730159 |
| 3838798dcf326c3ce89c188fa8b0ca17 | Class Elusimicrobia       | 0±0   | 25±8    | 0.0079365079 |
| 992de1dd3b965829ab8d75f3ced96eaa | Class Deltaproteobacteria | 0±0   | 22±18   | 0.0079365079 |
| 4a6e78fa80a4388d9b1f8a9b286cee42 | Order Xanthomonadales     | 41±14 | 63±7    | 0.0317460317 |
| 2c8b3833fcc16d7321a365244e39db9f | Order Rickettsiales       | 0±0   | 21±0    | 0.0158730159 |
| 70a34e043a7d156d7d304f5cb0ca4c84 | Order Rhizobiales         | 28±1  | 46±10   | 0.0317460317 |
| ca354988523e3c4fbacfe85b770dbb9  | Phylum Verrucomicrobia    | 0±0   | 16±6    | 0.0079365079 |
| fee58eab035a352e82a65cc489d07777 | Genus Hirschia            | 0±0   | 16±6    | 0.0158730159 |
| 2e8f0513d1d916c4a37bc57cd2fb9b18 | Genus Opitutus            | 28±7  | 15±9    | 0.0158730159 |
| d9448a1b73de1f09ec6868ac89da55f9 | Genus Dongia              | 41±6  | 24±8    | 0.0079365079 |
| 655ed3034655eb6b0c7c467d3570422d | Class Phycisphaerae       | 61±13 | 44±13   | 0.0317460317 |
| 1a60ebdb9ea705580ed21baccdb83707 | Order Sphingomonadales    | 90±28 | 63±16   | 0.0079365079 |
| 96325fa080ec907df171349fe5c3b90b | Order Solirubrobacterales | 81±8  | 53±5    | 0.0079365079 |
| 639792d7a10a2fbff57393b59e3abcaf | Genus Flavitalea          | 59±19 | 30±7    | 0.0079365079 |
| f965016a2233488c2e69348bbb472b57 | Order Xanthomonadales     | 30±9  | 0±13    | 0.0158730159 |
| b961b6b8c7d19b4ec13d2653e8d83689 | Genus Caenimonas          | 59±8  | 28±9    | 0.0317460317 |
| d929041c3e2976504a9a15ee3122cebe | Family Comamonadaceae     | 72±11 | 34±7    | 0.0079365079 |

|                                  |                            |        |        |              |
|----------------------------------|----------------------------|--------|--------|--------------|
| 20a595eae782cb9fff2847b195e1d97f | Genus Patulibacter         | 66±19  | 28±37  | 0.0317460317 |
| 5b14dbf098678cd784592d7c29237332 | Family Comamonadaceae      | 94±66  | 55±16  | 0.0079365079 |
| 421dfc8e26b7707e0156ca09409c6571 | Genus Ramlibacter          | 91±10  | 51±18  | 0.0079365079 |
| d983c3737f8e5e7cb2c569592a4fdca3 | Genus Chthoniobacter       | 59±29  | 17±7   | 0.0079365079 |
| 6523cdd46aa2eb9657437c3a80888a88 | Genus Solirubrobacter      | 159±52 | 109±22 | 0.0317460317 |
| 9e734cdb69272015147b754d14446964 | Family Intrasporangiaceae  | 78±44  | 26±27  | 0.0158730159 |
| 6ede21b8c056dcf441c136a0f5f48fb5 | Genus Blastococcus         | 57±1   | 0±27   | 0.0158730159 |
| 702853d835836536115f097235fe6693 | Genus Microvirga           | 100±49 | 41±20  | 0.0317460317 |
| 3e2895c199f191ef63b524f1d9e125d6 | Genus Rhizobacter          | 122±69 | 62±21  | 0.0158730159 |
| 80841afd936d44406d50ce6429de0705 | Family Comamonadaceae      | 63±40  | 0±0    | 0.0079365079 |
| 50ea59e716ce9e33f2050caba48a6619 | Family Comamonadaceae      | 70±7   | 0±15   | 0.0079365079 |
| 518b2949de955b8965d108427323cee9 | Genus Ramlibacter          | 118±12 | 45±4   | 0.0079365079 |
| 714bf623d76c84f057dfbb70eaac6056 | Family Verrucomicrobiaceae | 74±2   | 0±32   | 0.0317460317 |
| dcae6315654c1bdc94ec08bf335c57dd | Genus Chthoniobacter       | 75±39  | 0±37   | 0.0079365079 |
| bc59be3577d33ed21e0ea52d4fbf4836 | Order Burkholderiales      | 111±16 | 35±5   | 0.0079365079 |
| ef5de1a9261c8e157f0f8692342f7971 | Family Comamonadaceae      | 78±33  | 0±27   | 0.0317460317 |
| 8d642882b72ed3482ff3c05c3cd203f9 | Genus Chthoniobacter       | 128±20 | 47±14  | 0.0079365079 |
| 1989bb0c2d1ac1cf8991b40c25392037 | Genus Arenimonas           | 89±14  | 0±64   | 0.0079365079 |

Note: Values are medians ± interquartile ranges, from a Sequence Variant table rarefied to equal read numbers between samples. Tests with p-values < 0.05 are shown. \*The lowest taxonomic affiliation available is shown.
