# Supplementary material for: Enrichment of Verrucomicrobia, Actinobacteria and Burkholderiales drives selection of bacterial community from soil by maize roots in a traditional milpa agroecosystem
Source: PLOS journal article supplement (doi:10.1371/journal.pone.0208852), 2018-12-20
Supplement: S2 (10.1371/journal.pone.0208852.s002) [file journal.pone.0208852.s002]

S2 Table. Sequences per sample

| Sample | raw     | filtered | denoised | merged | non-chimeric |
|--------|---------|----------|----------|--------|--------------|
| M1     | 96442   | 82180    | 82180    | 50857  | 47987        |
| M2     | 86123   | 73854    | 73854    | 44344  | 41471        |
| M3     | 91042   | 81773    | 81773    | 54282  | 49545        |
| M5     | 88699   | 77052    | 77052    | 46581  | 44017        |
| M6     | 75986   | 66134    | 66134    | 36876  | 34870        |
| C1     | 101274  | 86968    | 86968    | 54916  | 51168        |
| C2     | 112977  | 98401    | 98401    | 61543  | 57323        |
| C3     | 196560  | 170569   | 170569   | 117763 | 104479       |
| C5     | 113402  | 96912    | 96912    | 64240  | 58579        |
| C6     | 122541  | 106589   | 106589   | 70644  | 65306        |
| Total  | 1085046 | 940432   | 940432   | 602046 | 554745       |

Note: raw reads were processed using dada2. Samples starting with M were collected at the roots of maize plants and samples starting with C were collected from bulk soil, collected at 30 cm from each plant.
